# Supplementary material for: A Model to Predict In-Hospital Mortality in HIV/AIDS Patients with Pneumocystis Pneumonia in China: The Clinical Practice in Real World
Source: PubMed Central journal article supplement (PMC6398076; doi:10.1155/2019/6057028), 2019-02-17
Supplement: 6057028.f1.pdf [file 6057028.f1.pdf]

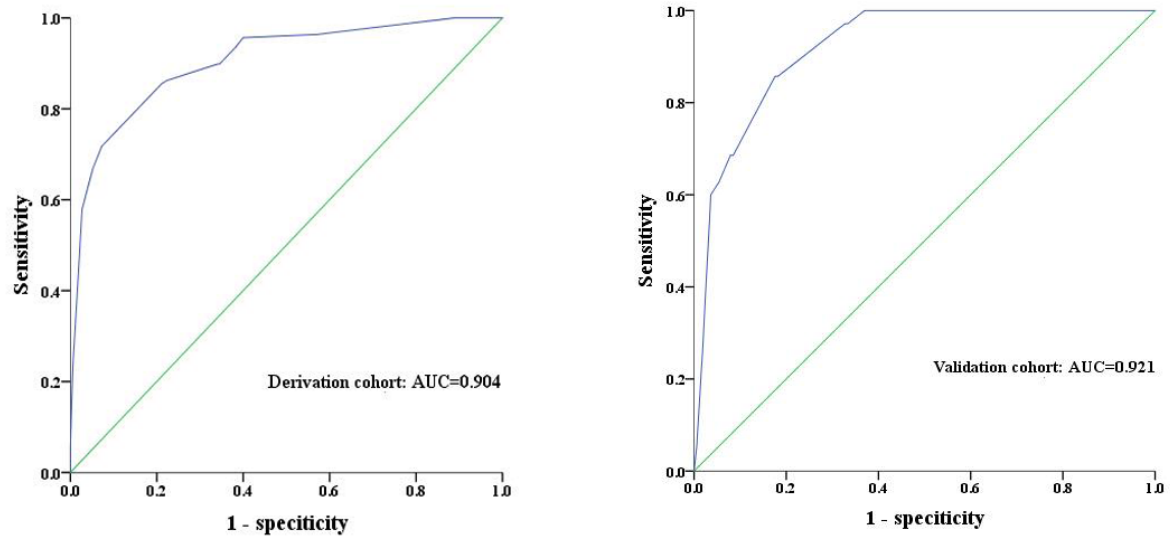

**Figure S1.** .The area under the ROC curves (AUC) in the derivation cohort and validation cohorts.

**Table S1: Risk factors for mortality rate by Cox proportional hazard regression in HIV/AIDS patients with PCP.**

| Characteristics           |                           | Unadjusted           | <i>p</i> value | Adjusted           | <i>p</i> value |
|---------------------------|---------------------------|----------------------|----------------|--------------------|----------------|
|                           |                           | HR (95% CI)          |                | HR (95% CI)        |                |
| <b>Age (years)</b>        | <50                       | 1                    |                |                    |                |
|                           | ≥50                       | 1.763(1.204,2.580)   | 0.004          |                    |                |
| <b>Gender</b>             | Female                    | 1                    |                |                    |                |
|                           | Male                      | 1.126(0.572,2.216)   | 0.731          |                    |                |
| <b>Marriage</b>           | Married                   | 1                    |                |                    |                |
|                           | Unmarried                 | 1.399(0.981,1.995)   | 0.063          |                    |                |
| <b>Transmission route</b> | Homosexual                | 1                    |                |                    |                |
|                           | Heterosexual              | 0.977(0.441,2.166)   | 0.954          |                    |                |
|                           | Blood transfusion         | 1.190(0.161,8.785)   | 0.864          |                    |                |
|                           | Intravenous drug          | 4.681(1.413,15.507)  | 0.012          |                    |                |
|                           | Unknown                   | 1.729(1.112,2.688)   | 0.015          |                    |                |
| <b>Laboratory results</b> | CD4 > 50cells/ul          | 1                    |                | 1                  |                |
|                           | CD4 ≤ 50cells/ul          | 2.860(1.612,5.072)   | <0.001         | 1.844(1.022,3.326) | 0.042          |
|                           | HGB > 90g/L               | 1                    |                | 1                  |                |
|                           | HGB ≤ 90g/L               | 1.861 (1.118, 3.100) | 0.017          | 2.063(1.220,3.490) | 0.007          |
|                           | LDH < 350 IU/L            | 1                    |                | 1                  |                |
|                           | LDH ≥ 350 IU/L            | 4.706(3.097,7.151)   | <0.001         | 2.128(1.382,3.279) | 0.001          |
|                           | ALB > 30g/L               | 1                    |                |                    |                |
|                           | ALB ≤ 30g/L               | 1.899(1.346,2.678)   | <0.001         |                    |                |
|                           | PaO <sub>2</sub> > 70mmHg | 1                    |                | 1                  |                |
|                           | PaO <sub>2</sub> ≤ 70mmHg |                      |                |                    |                |

|                                           |                           |                       |        |                     |        |
|-------------------------------------------|---------------------------|-----------------------|--------|---------------------|--------|
|                                           |                           | 19.193(9.748,37.789)  | <0.001 | 7.328(3.621,14.830) | <0.001 |
| <b>Vital signs</b>                        | Respiration <30 times/min | 1                     |        |                     |        |
|                                           | Respiration ≥30 times/min | 0.238(0.166,0.341)    | <0.001 |                     |        |
|                                           | Heart rate <130 times/min | 1                     |        | 1                   |        |
|                                           | Heart rate ≥130 times/min | 4.335(2.663,7.058)    | <0.001 | 1.860(1.131,3.060)  | 0.015  |
| <b>Duration of ART prior to admission</b> | >6 months                 | 1                     |        |                     |        |
|                                           | <6 months                 | 1.086(0.599,1.967)    | 0.786  |                     |        |
|                                           | ART-naive                 | 0.488(0.068,3.492)    | 0.475  |                     |        |
| <b>Later admission to ICU</b>             | NO                        | 1                     |        | 1                   |        |
|                                           | Yes                       | 16.610(11.310,24.394) | <0.001 | 6.418(4.212,9.781)  | <0.001 |
| <b>Comorbidity</b>                        |                           |                       |        |                     |        |
| Bacterial pneumonitis                     | NO                        | 1                     |        |                     |        |
|                                           | Yes                       | 4.657 (2.053,10.567)  | <0.001 |                     |        |
| CMV pneumonitis                           | NO                        | 1                     |        |                     |        |
|                                           | Yes                       | 1.606 (1.139,2.265)   | 0.007  |                     |        |
| Cryptococcal pneumonitis                  | NO                        | 1                     |        |                     |        |
|                                           | Yes                       | 1.117 (0.356,3.510)   | 0.849  |                     |        |
| Fungal pneumonia                          | NO                        | 1                     |        |                     |        |
|                                           | Yes                       | 1.729 (1.188,2.517)   | 0.004  |                     |        |
| PTB                                       | NO                        | 0.751 (0.431,1.307)   | 0.311  |                     |        |
|                                           | Yes                       | 1                     |        |                     |        |
| Severe pneumonia                          | NO                        | 11.129 (7.846,15.787) | <0.001 |                     |        |
|                                           | Yes                       | 1                     |        |                     |        |
| Pneumothorax                              | NO                        | 1                     |        | 1                   |        |
|                                           | Yes                       |                       |        |                     |        |

|                        |     |                       |        |                    |       |
|------------------------|-----|-----------------------|--------|--------------------|-------|
| CNS infection          | Yes | 8.328 (5.397,12.850 ) | <0.001 | 1.630(1.027,2.588) | 0.038 |
|                        | NO  | 1                     |        |                    |       |
| Cardiovascular disease | Yes | 1.350(0.686, 2.657)   | 0.385  |                    |       |
|                        | NO  | 1                     |        |                    |       |
| Malignancies           | Yes | 1.513 (0.816,2.806)   | 0.189  |                    |       |
|                        |     | 1                     |        |                    |       |
|                        |     | 1.435 (0.587,3.509)   | 0.428  |                    |       |

**Note:** CI: Confidence Interval; HR: hazard ratios; HGB: Haemoglobin; ALB: Albumin; ART:antirretroviral therapy; PCP:pneumocystis pneumonia; CMV: cytomegalovirus; PaO<sub>2</sub>: Partial pressure of oxygen; LDH: lactate dehydrogenase; CNS: central nervous system; PTB:pulmonary tuberculosis.
